# Supplementary material for: SRSF7 downregulation induces cellular senescence through generation of MDM2 variants
Source: publisher site journal article supplement (doi:10.18632/aging.205420), 2023-12-29
Supplement: Supplementary file [file aging-v15i24-205420-supplementary-material-SD1.pdf]

**SUPPLEMENTARY FIGURES**

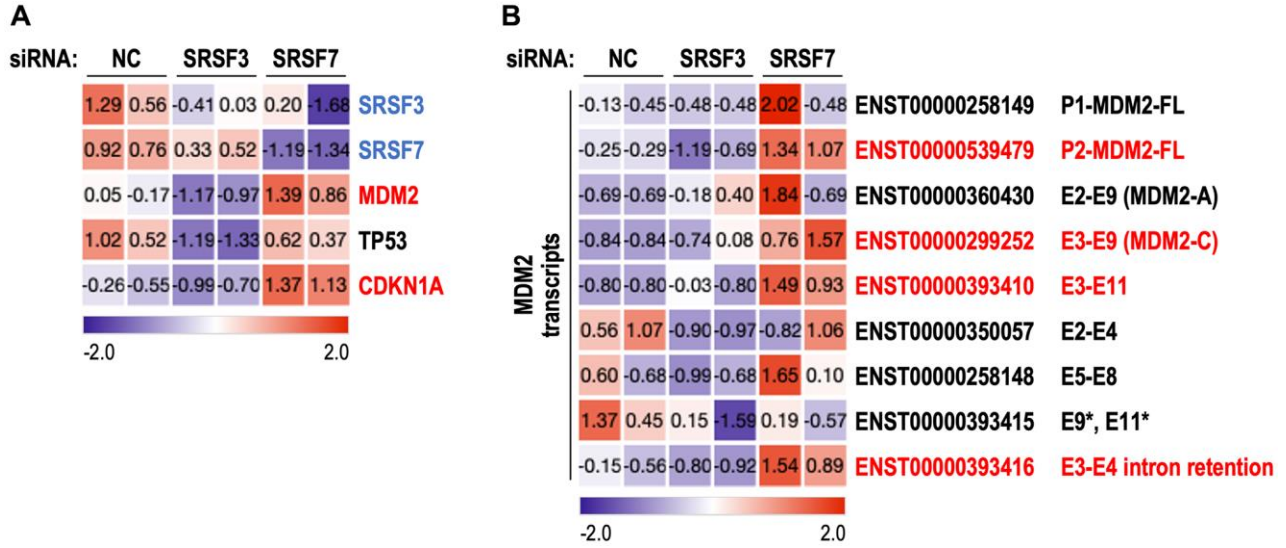

**Supplementary Figure 1. Gene and transcript expression heatmaps of HDFs transfected with siRNA against either SRSF3 or SRSF7.** The values are scaled into z-score. (A) Gene expression heatmap. (B) Transcript expression heatmap of MDM2 splice variants. EMSEMBLE ID and splicing information are displayed together. Transcripts increased exclusively in SRSF7 knockdown samples are expressed in red color.

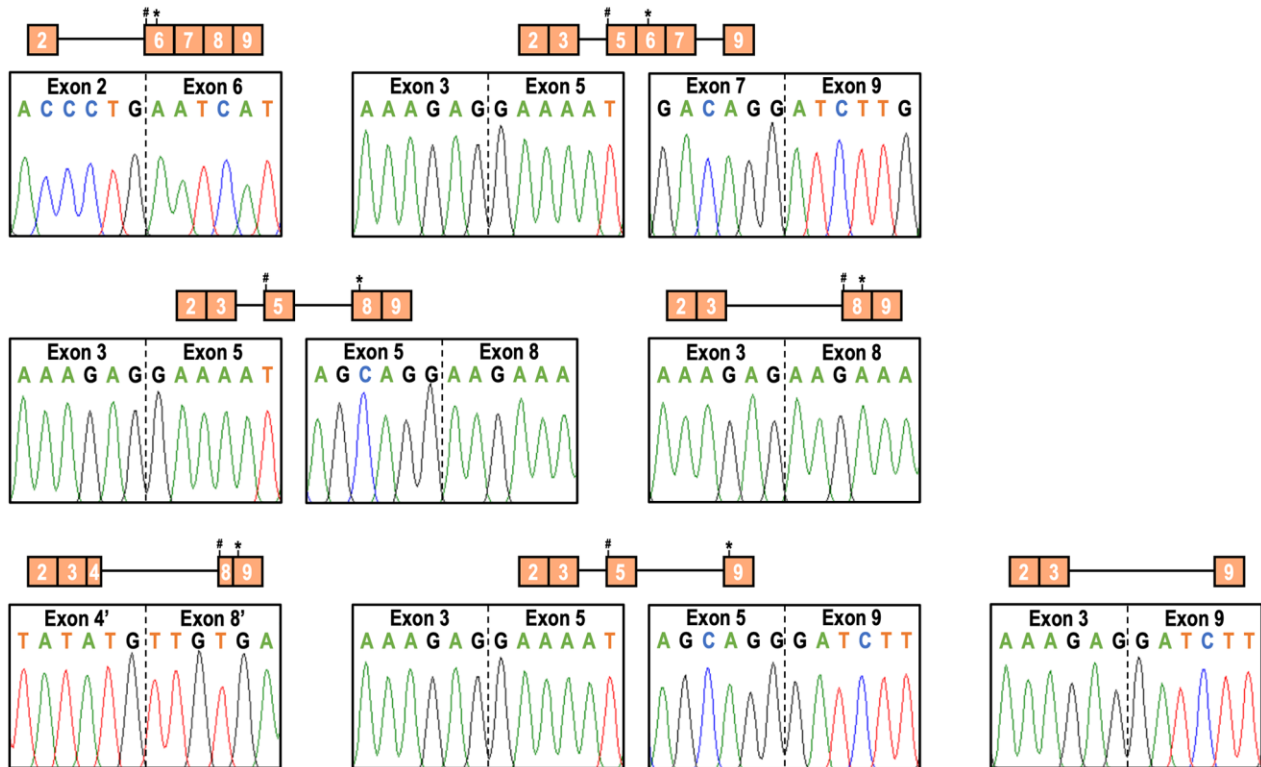

**Supplementary Figure 2. The schematics of DNA sequencing results of MDM2 splice variants generated by SRSF7 knockdown.** Each variant is displayed by a schematic of exons included in the transcript and the graph of DNA sequencing result indicates the exon junctions where exon skipping occurred. (# a point of frameshift occurrence; \* the position of stop codon).
